# Supplementary material for: Coupling NiFe-MOF nanosheets with Ni3N microsheet arrays for efficient electrocatalytic water oxidation
Source: Royal Society of Chemistry journal article supplement (doi:10.1039/d1nj03730g), 2021-01-01
Supplement: d1nj03730g2.pdf [file d1nj03730g2.pdf]

*Supplementary Information (SI) for:*

**Coupling NiFe-MOF nanosheets on Ni<sub>3</sub>N microsheet arrays  
for efficient electrocatalytic water oxidation**

Boran Wang,<sup>†a</sup> Duo Chen,<sup>†c</sup> Shihui Jiao,<sup>a</sup> Qi Zhang,<sup>a</sup> Wenwen Wang,<sup>a</sup> Mengjie Lu,<sup>c</sup>  
Zhenxing Fang,<sup>b</sup> Guangsheng Pang<sup>\*a</sup> and Shouhua Feng<sup>a</sup>

## Experimental section

### Preparation of NiFe-MOF@Ni<sub>3</sub>N/NF

In a typical procedure for the preparation of Ni(OH)<sub>2</sub>/NF, 4 mmol Ni(NO<sub>3</sub>)<sub>2</sub>·6H<sub>2</sub>O (98%, Sinopharm Chemical Reagent Co.,Ltd), 20 mmol of CO(NH<sub>2</sub>)<sub>2</sub> (99.5%, Aladdin), and 12 mmol NH<sub>4</sub>F (99.99%, Aladdin) were dissolved in 50 mL deionized water under stirring. The reaction solution and blank Ni foam (1 × 5 cm<sup>2</sup>) were transferred to a 100 mL autoclave and maintained at 120 °C for 6 h. After being cooled down to room temperature, the product on Ni foam (Ni(OH)<sub>2</sub>/NF) was washed with deionized water and ethanol, and dried in a vacuum overnight. Ni<sub>3</sub>N/NF was obtained by annealing Ni(OH)<sub>2</sub>/NF at 380 °C for 2 h with a heating rate of 2 °C min<sup>-1</sup> under an NH<sub>3</sub> atmosphere. The loading amount of Ni<sub>3</sub>N on the Ni foam was 2.8 mg cm<sup>-2</sup>.

To prepare NiFe-MOF@Ni<sub>3</sub>N/NF, the prepared Ni<sub>3</sub>N/NF was immersed into a homogenous solution of 1 mmol FeCl<sub>2</sub>·4H<sub>2</sub>O (99%, Sinopharm Chemical Reagent Co.,Ltd), 1 mmol 1,4-H<sub>2</sub>BDC (TPA, 99%, Sinopharm Chemical Reagent Co.,Ltd), 28 mL DMF, 2 mL ethanol and 2 mL deionized water. The mixture was transferred to a 50 mL autoclave and maintained at 125 °C for 10 h. After being cooled down to room temperature, the product on Ni foam (NiFe-MOF@Ni<sub>3</sub>N/NF) was washed with deionized water and ethanol, and dried in a vacuum overnight. The loading amount of NiFe-MOF@Ni<sub>3</sub>N on the Ni foam was 4.5 mg cm<sup>-2</sup>.

Similarly, NiFe-MOF/NF was prepared by replacing Ni<sub>3</sub>N/NF with blank Ni foam. The loading amount of NiFe-MOF on the Ni foam was 2.3 mg cm<sup>-2</sup>.

### Preparation of IrO<sub>2</sub>/NF

20 mg IrO<sub>2</sub> was dispersed in 950 μL isopropanol and 50 μL Nafion to form a homogeneous ink by sonication for 40 minutes. Then, the prepared ink was dropped onto Ni foam with a mass loading of 4.5 mg cm<sup>-2</sup> to serve as a working electrode.

### Structural Characterization

X-ray diffraction (XRD) measurement was carried out on a Rigaku D/Max 2550 X-ray diffractometer with Cu Kα radiation (λ = 1.5418 Å). The scanning electron microscope (SEM) image and energy dispersive spectrometer (EDS) was obtained with a JEOL JSM 6700F electron microscope. The transmission electron microscope (TEM) image was obtained with a Tecnai G2 F30 S-Twin microscope equipped with a field emission gun operating at 200 kV. The X-ray photoelectron spectroscopy (XPS) was performed on an ESCALAB 250 X-ray photoelectron spectrometer with a monochromatic X-ray source (Al Kα hν = 1486.6 eV). The contact angle was measured by Kruss DSA 100 system.

### Electrochemical measurements

Electrochemical measurements were performed on a CHI 660e electrochemical station with a three-electrode system. The obtained products were directly used as the

working electrodes ( $1 \times 0.3 \text{ cm}^2$ ). A graphite rod and Hg/HgO electrode were used as the counter electrode and reference electrode, respectively. 1 M KOH aqueous solution was used as the electrolyte. The polarization curves were characterized by linear sweep voltammetry at a scan rate of  $2 \text{ mV s}^{-1}$ . And all curves were corrected with iR-compensation. The electrochemical impedance spectroscopy (EIS) was collected at 1.48 V (vs. RHE). The frequency range was 100 kHz to 0.01 Hz and the amplitude of the applied voltage was 5 mV. The cyclic voltammetry (CV) measurement was carried out to assess the electrochemical double-layer capacitance ( $C_{dl}$ ). The scan rates were in the range of  $30\text{-}80 \text{ mV s}^{-1}$ . All potentials measured were calibrated to the reversible hydrogen electrode (RHE) by the formula:  $E_{\text{vs. RHE}} = E_{\text{vs. Hg/HgO}} + 0.098 + 0.059 \text{ pH}$ .

### TOF calculations

According to the references (Nat. Commun., 2018, **9**, 5309; Nano Energy, 2018, **53**, 492-500), we have carried out the TOF calculation using the following formula (1)

$$TOF_{\text{per site}} = \frac{\# \text{ Total Oxygen Turn Overs/cm}^2 \text{ geometric area}}{\# \text{ Surface Sites/cm}^2 \text{ geometric area}}$$

(1)

The number of total oxygen turn overs was calculated from the current density by the following equation (2):

$$\begin{aligned} \#_{O_2} &= \left( j \frac{\text{mA}}{\text{cm}^2} \right) \left( \frac{1 \text{ C s}^{-1}}{1000 \text{ mA}} \right) \left( \frac{1 \text{ mol } e^{-}}{96485.3 \text{ C}} \right) \left( \frac{1 \text{ mol } O_2}{4 \text{ mol } e^{-}} \right) \left( \frac{6.022 \times 10^{23} \text{ } O_2 \text{ molecules}}{1 \text{ mol } O_2} \right) \\ &\times 10^{15} \frac{O_2/s}{\text{cm}^2} \text{ per } \frac{\text{mA}}{\text{cm}^2} \end{aligned}$$

(2)

The total number of effective surface sites was calculated based on the following equation (3):

$$\frac{\# \text{ Surface sites}}{\text{cm}^2 \text{ geometric area}} = \frac{\# \text{ Surface sites (flat standard)}}{\text{cm}^2 \text{ geometric area}} \times \text{Roughness factor}$$

(3)

In the equation (3), the roughness factor ( $R_f$ ) can be determined by the double-layer capacitance ( $C_{dl}$ ) from Fig. 3d of the main text. The specific capacitance can be converted into an electrochemical active surface area using the specific capacitance value for a flat standard with  $1 \text{ cm}^2$  of surface area. According to the reference (Energy Environ. Sci., 2015, **8**, 3022-3029), we assumed  $60 \mu\text{F cm}^{-2}$  for a flat electrode and the surface sites of  $2 \times 10^{15}$  for the flat standard electrode. Thus, the

number of surface active sites for catalyst was estimated to be:  $\frac{C_{dl} \times 10^3}{60} \times 2 \times 10^{15}$

$$\text{surface sites/cm}^2 = \frac{C_{dl}}{30} \times 10^{18} \text{ surface sites/cm}^2.$$

Therefore, the  $\text{TOF}_{\text{OER}}$  per site for the catalyst at different overpotentials ( $\eta$ ) was calculated as follows:

$$\text{TOF}_{\text{OER}} = \frac{1.56 \times 10^{15}}{\frac{C_{dl}}{30} \times 10^{18}} \times j$$

(4)

$j$  corresponds to the current density at different overpotentials.

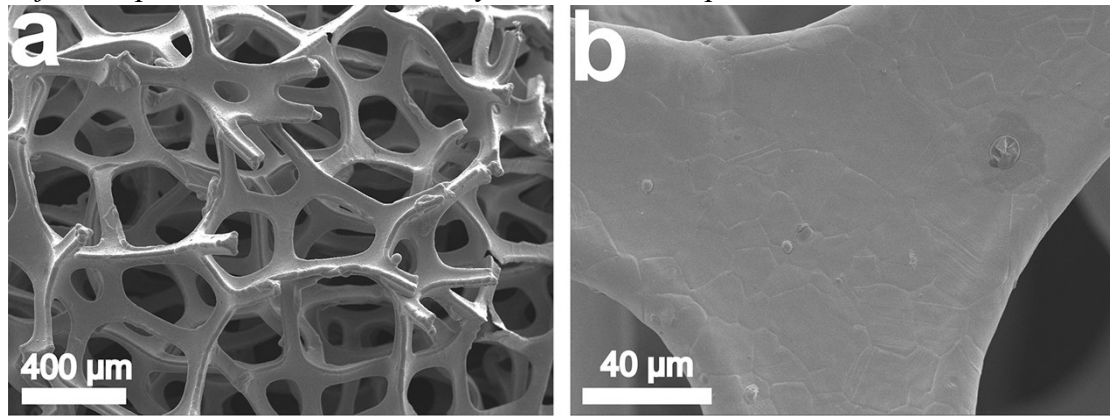

**Fig. S1** (a, b) SEM images of blank Ni foam.

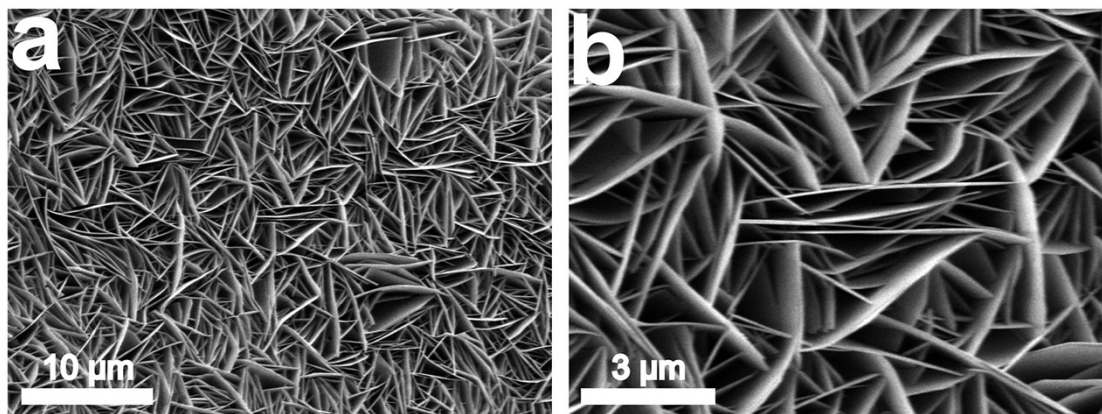

**Fig. S2** (a, b) SEM images of Ni(OH)<sub>2</sub>/NF.

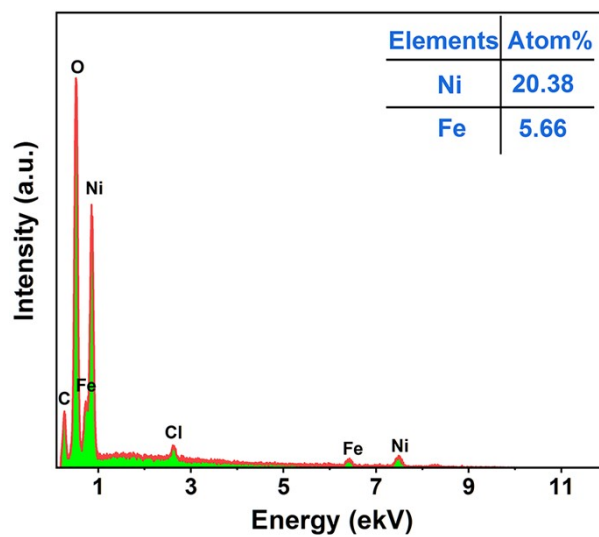

**Fig. S3** EDS spectrum of NiFe-MOF@Ni<sub>3</sub>N/NF based on the element mapping.

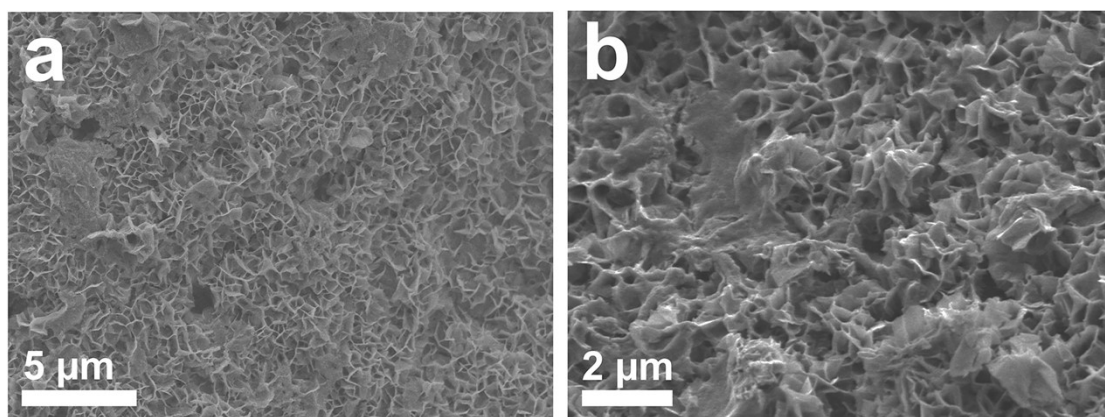

**Fig. S4** (a, b) SEM images of NiFe-MOF/NF.

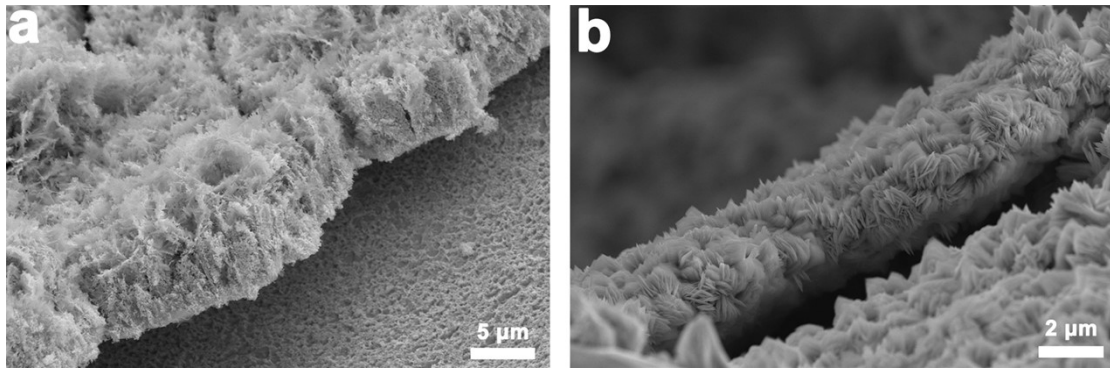

**Fig. S5** Cross-section SEM images of (a) NiFe-MOF@Ni<sub>3</sub>N/NF and (b) NiFe-MOF/NF.



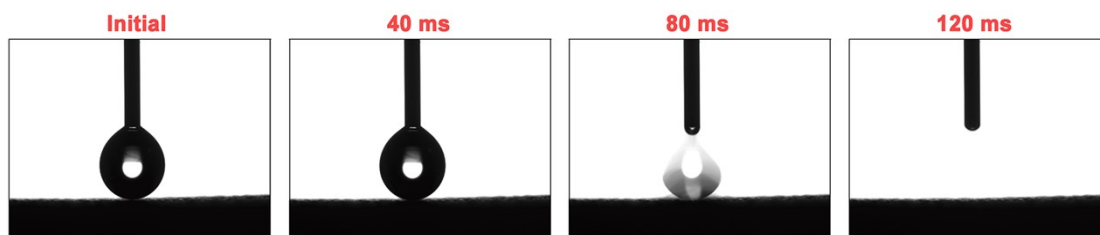

**Fig. S6** Penetration process of water droplet on the NiFe-MOF@Ni<sub>3</sub>N/NF.

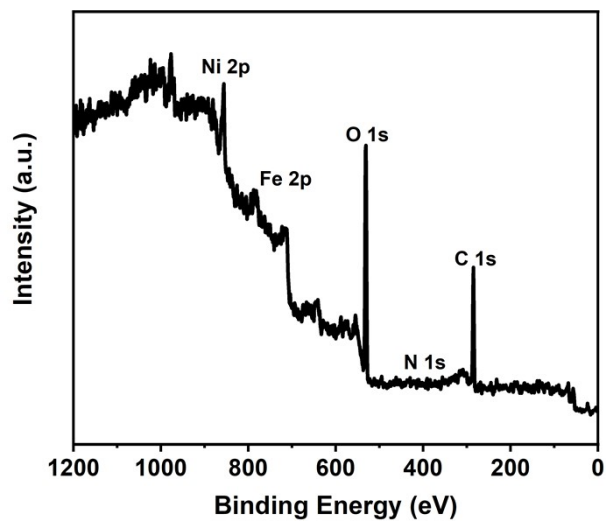

**Fig. S7** XPS survey spectrum for NiFe-MOF@Ni<sub>3</sub>N/NF.

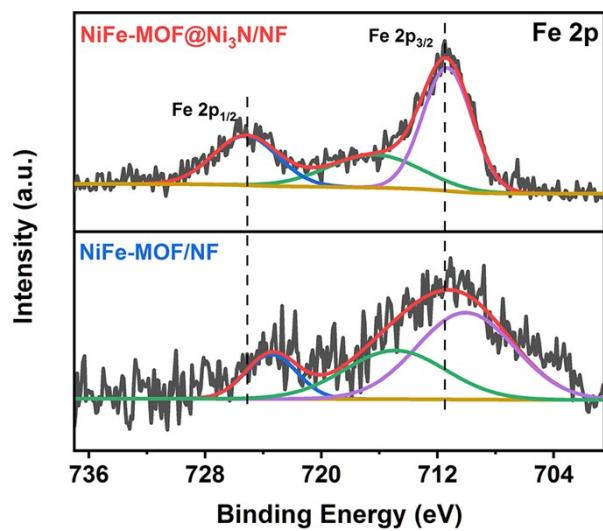

**Fig. S8** XPS spectra of Fe 2p for NiFe-MOF/NF and NiFe-MOF@Ni<sub>3</sub>N/NF.

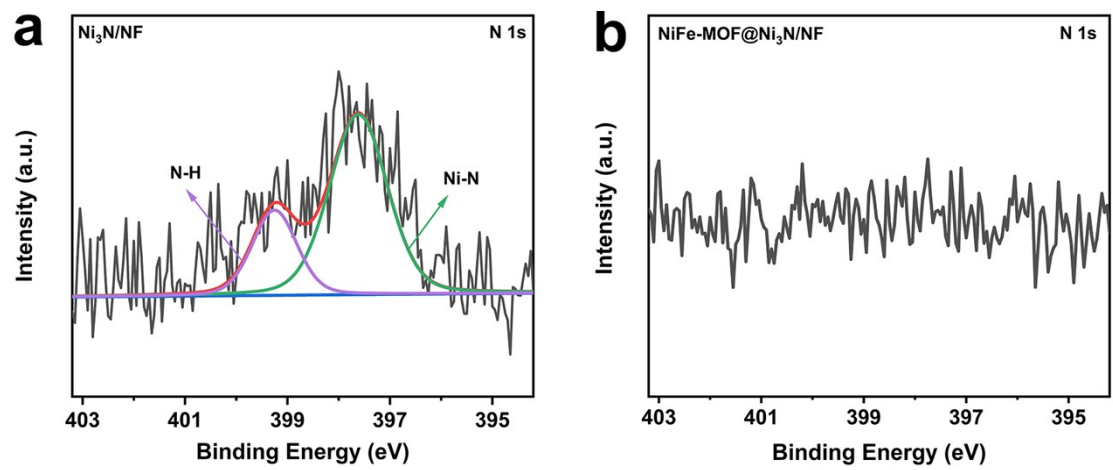

**Fig. S9** XPS spectra of N 1s for (a) Ni<sub>3</sub>N/NF and (b) NiFe-MOF@Ni<sub>3</sub>N/NF.

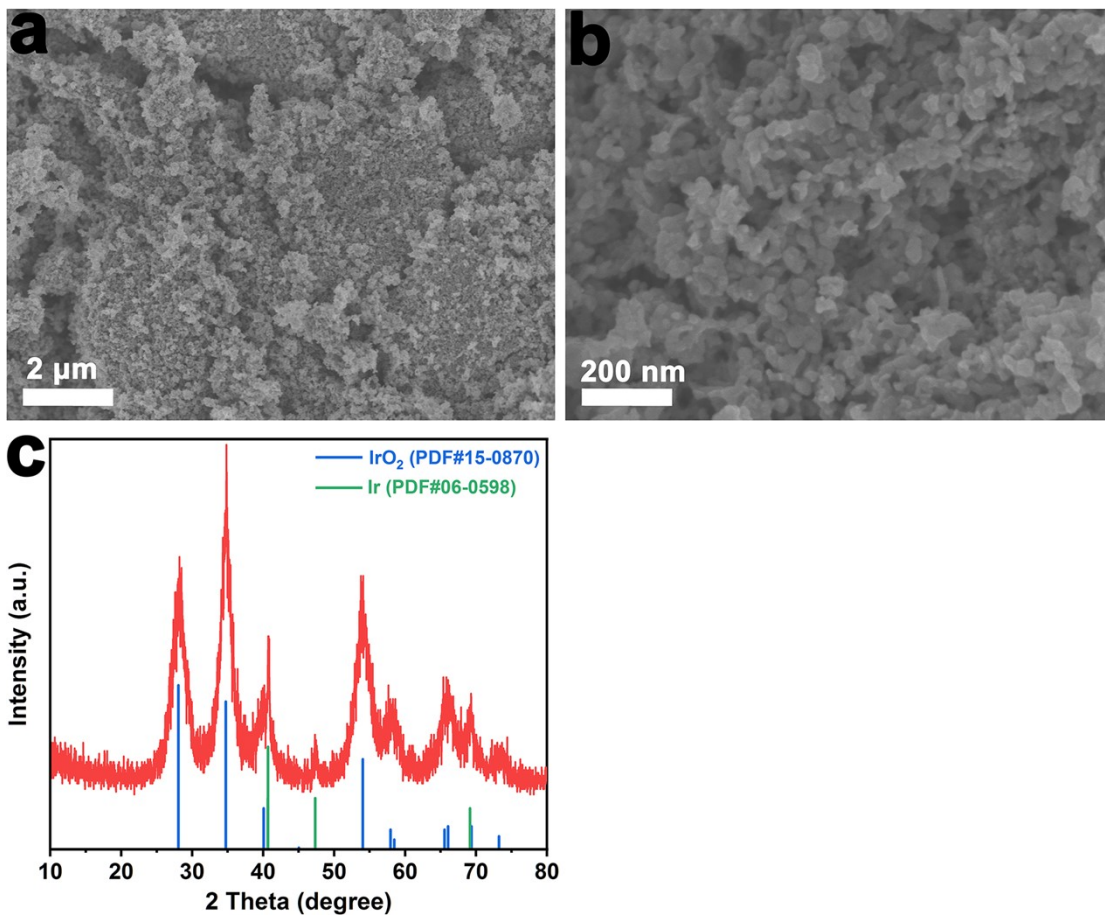

**Fig. S10** (a, b) SEM images and (c) XRD pattern of IrO<sub>2</sub>.

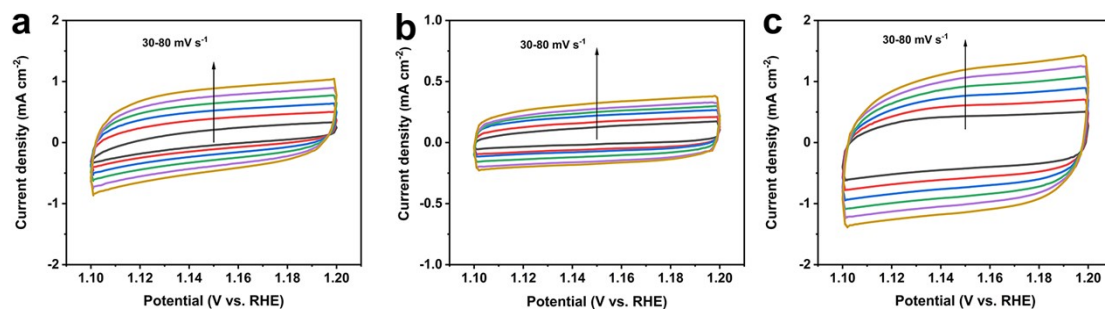

**Fig. S11** CV curves of (a) Ni<sub>3</sub>N/NF; (b) NiFe-MOF/NF and (c) NiFe-MOF@Ni<sub>3</sub>N/NF.

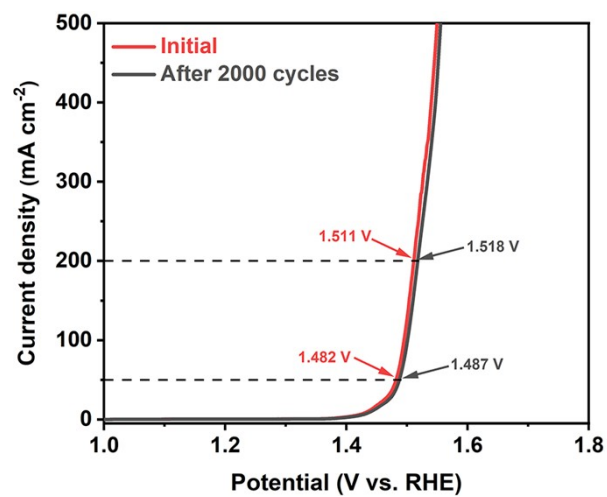

**Fig. S12** Polarization curves for NiFe-MOF@Ni<sub>3</sub>N/NF obtained before and after 2000 CV cycles.

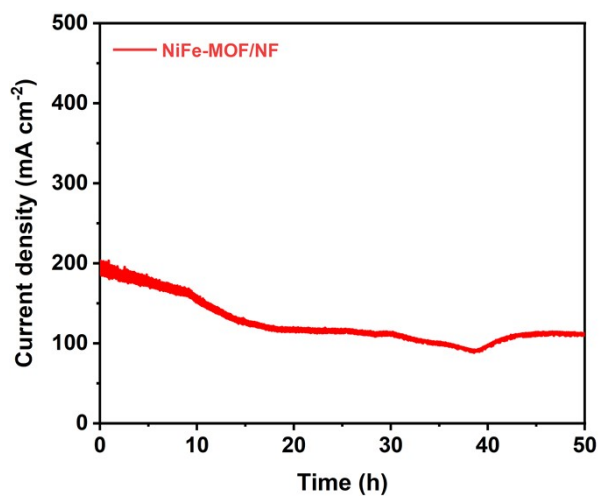

**Fig. S13** Stability test of NiFe-MOF/NF at the current density of 200 mA cm<sup>-2</sup>.



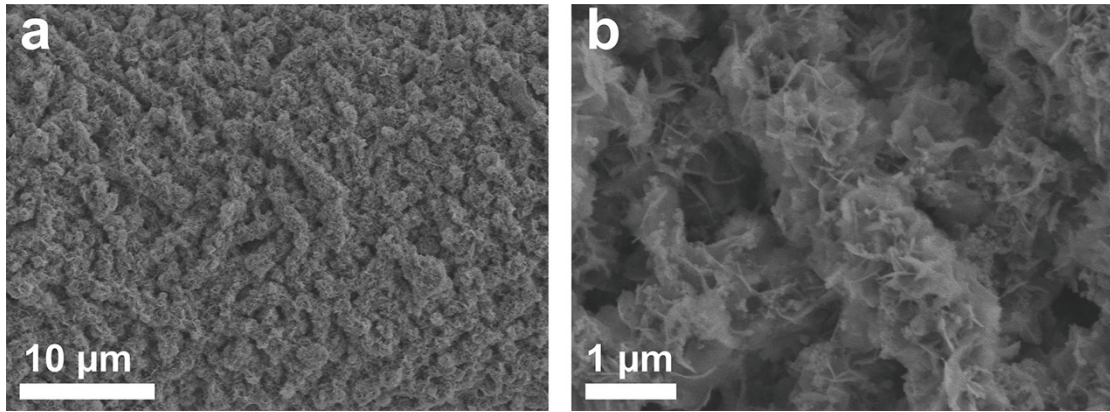

**Fig.S14** (a, b) SEM images of NiFe-MOF@Ni<sub>3</sub>N/NF after stability test.

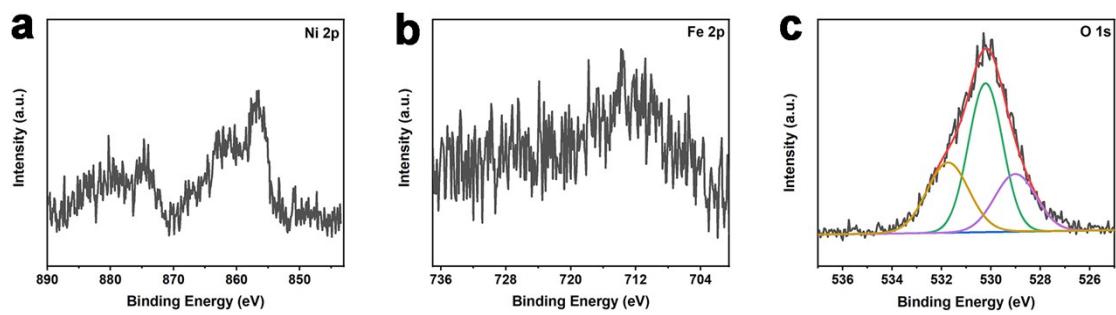

**Fig. S15** High-resolution XPS spectra of (a) Ni 2p; (b) Fe 2p and (c) O 1s for NiFe-MOF@Ni<sub>3</sub>N/NF after stability test.

**Table S1** OER performance of some recently reported MOFs based OER electrocatalysts and NiFe-MOF@Ni<sub>3</sub>N/NF in this work.

| Reference                                                           | Electrocatalyst                                 | <i>j</i> (mA cm <sup>-2</sup> ) | <i>η</i> (mV) |
|---------------------------------------------------------------------|-------------------------------------------------|---------------------------------|---------------|
| This work                                                           | NiFe-MOF@Ni <sub>3</sub> N/NF                   | 50                              | 252           |
|                                                                     |                                                 | 200                             | 281           |
| <i>ACS Appl. Mater. Interfaces</i> , 2019, <b>11</b> , 41595-41601. | Ni-BDC@NiS                                      | 20                              | 330           |
| <i>ChemSusChem</i> , 2020, <b>13</b> , 5647.                        | Mn <sub>0.52</sub> Fe <sub>0.71</sub> Ni-MOF-74 | 10                              | 245           |
|                                                                     |                                                 | 100                             | 462           |
| <i>J. Mater. Chem. A</i> , 2020, <b>8</b> , 14574-14582.            | Ni <sub>3</sub> S <sub>2</sub> /MIL-53(Fe)      | 100                             | 251           |
| <i>J. Mater. Chem. A</i> , 2020, <b>8</b> , 16908-16912.            | NiFe-MOF/NiSe <sub>x</sub> /NF                  | 100                             | 230           |
| <i>J. Power Sources</i> , 2020, <b>451</b> , 227295.                | Ni <sub>3</sub> S <sub>2</sub> @MIL-53(NiFeCo)  | 50                              | 236           |
| <i>Nanoscale</i> , 2019, <b>11</b> , 14785-14792.                   | Ni-S/MIL-53(Fe)                                 | 10                              | 256           |
|                                                                     |                                                 | 100                             | 298           |
| <i>Nanoscale</i> , 2020, <b>12</b> , 67-71.                         | MIL-53(Co-Fe)                                   | 100                             | 262           |
| <i>Adv. Funct. Mater.</i> , 2018, <b>28</b> , 1801554.              | Ni-MOF@Fe-MOF                                   | 10                              | 265           |
| <i>Nat. Commun.</i> , 2017, <b>8</b> , 15341.                       | NiFe-MOF                                        | 10                              | 240           |

**Table S2** TOF values for different samples at the overpotential of 250 and 300 mV, respectively.

|                                     | <b>Electrocatalyst</b>        | <b><math>\eta = 250</math> mV</b> | <b><math>\eta = 300</math> mV</b> |
|-------------------------------------|-------------------------------|-----------------------------------|-----------------------------------|
| <b>TOF (s<sup>-1</sup>) for OER</b> | Ni <sub>3</sub> N/NF          | 0.0121                            | 0.0285                            |
|                                     | NiFe-MOF/NF                   | 0.0487                            | 0.391                             |
|                                     | NiFe-MOF@Ni <sub>3</sub> N/NF | 0.144                             | 1.04                              |

**Table S3** Comparison of the TOF values of our electrocatalyst with recently reported ones.

| Reference                                                      | Electrocatalyst                        | TOF (s <sup>-1</sup> ) for OER     |
|----------------------------------------------------------------|----------------------------------------|------------------------------------|
| This work                                                      | NiFe-MOF@Ni <sub>3</sub> N/NF          | 0.144 at 250 mV;<br>1.04 at 300 mV |
| <i>Nat. Commun.</i> , 2018, <b>9</b> , 2014.                   | NiFe/Ni-P                              | 0.13 at 250 mV                     |
| <i>Adv. Mater.</i> , 2018, <b>30</b> , 1705516.                | Co-Ni <sub>3</sub> N                   | 0.0134 at 350 mV                   |
| <i>Nat. Commun.</i> , 2018, <b>9</b> , 1809.                   | IFONFs-45                              | 0.2141 at 370 mV                   |
| <i>Nano Energy</i> , 2019, <b>63</b> , 103880.                 | NiFe-LDH/MXene/NF                      | 0.82 at 300 mV                     |
| <i>Small</i> , 2020, <b>16</b> , 1906564.                      | D-Ni-MOF NSAs                          | 0.440 at 300 mV                    |
| <i>Adv. Funct. Mater.</i> , 2020, <b>31</b> ,<br>2006484.      | Ni <sub>2</sub> P-Fe <sub>2</sub> P/NF | 0.925 at 300 mV                    |
| <i>Appl. Catal. B-Environ.</i> , 2020, <b>270</b> ,<br>118889. | Ni <sub>2</sub> Co-N                   | 0.012 at 270 mV                    |
| <i>Adv. Mater.</i> , 2020, <b>32</b> , 1905679.                | W <sub>2</sub> N/WC                    | 0.15 at 370 mV                     |
